# Supplementary material for: Membrane Interactome of a Recombinant Fragment of Human Surfactant Protein D Reveals GRP78 as a Novel Binding Partner in PC3, a Metastatic Prostate Cancer Cell Line
Source: Front Immunol. 2021 Jan 19;11:600660. doi: 10.3389/fimmu.2020.600660 (PMC7850985; doi:10.3389/fimmu.2020.600660)
Supplement: Supplementary File S3 — The PPI network of 347 proteins was analyzed for network parameters to shortlist critical proteins of the rfhSP-D interactome. 20 proteins were selected and ranked based on connectivity, perturbation, and disruption scores. [file Table_3.xlsx]

## Sheet: networkanalysis_all
Proteins	Hub-degree	Pertubation Score	Disruption Score
RPLP0	67	0.797087	0.611817
RPLP2	52	0.768622	0.605057
RPS12	49	0.715018	0.591536
GPI	37	0.308603	0.584776
TPI1	93	0	1.28279
PSMD2	46	0.424204	0.589846
PSMA6	57	1.08493	0.638859
COX5A	21	0	0.169551
COX6B1	8	0.760979	0.579705
CCT3	68	1.04768	0.586466
CCT5	78	1.49235	0.623648
CCT8	82	1.90054	0.66083
TLN1	20	-1.22324	0.630408
VCL	39	0.0464941	0.82815
UBA52	51	-0.418637	0.845051
RPL12	60	0.942694	0.628718
HNRNPK	63	1.12969	0.696322
PTBP1	53	0.549625	0.65069
PGK1	67	0.61252	0.610127
RPS3	72	1.59423	0.621958
HNRNPC	55	1.12924	0.613507
HNRNPA1	68	1.46837	0.699703
PTGES3	46	-0.230408	0.713223
HSP90AA1	119	4.52252	0.841671
ATP5H	29	0.0101042	0.579705
ATP5B	66	1.65902	0.8197
HSP90AB1	82	1.23823	0.611817
STIP1	57	0.072331	0.635479
RPS18	55	-0.324557	0.625338
CALR	61	0.859272	0.762236
PDIA3	61	0.08103	0.694632
TUBB	48	0.0753137	0.648999
TUBA1B	30	-0.395497	0.583085
CCT4	73	1.62694	0.740265
PSMD11	39	0.950982	0.579705
CCT6A	64	0.768734	0.608437
CCT2	97	2.1303	0.804489
HSPA5	81	1.56201	1.06307
HSP90B1	65	1.32774	0.65914
P4HB	71	1.21002	0.792658
PSMA7	60	0.990346	0.598296
USP14	18	0.607919	0.579705
S100A9	12	0.081926	0.603367
S100A8	11	0.0322275	0.616888
YWHAZ	45	-0.509053	0.615197
YWHAB	37	0.243828	0.65407
COL1A2	11	-0.146064	0.586466
COL1A1	15	0.343358	0.581395
TKT	44	0.341748	0.596606
TALDO1	39	0.466502	0.755476
HNRNPM	38	0.876295	0.709843
NSFL1C	4	-0.4942	0.581395
VCP	81	1.83481	1.10364
PSMA3	73	1.96327	0.698012
KRT10	15	1.38507	0.579705
KRT1	18	1.3812	0.65576
TXNRD1	54	0.416678	0.691252
TXN	63	0	0.568956
RAN	67	1.08144	0.588156
KPNB1	56	0.932298	0.748716
SNRPA1	36	0.239868	0.584776
SF3A1	27	0.940506	0.579705
DLAT	28	0.861598	0.583085
DLD	39	0.725839	0.579705
HNRNPA2B1	68	2.0966	0.611817
EEF2	96	0.192343	0.924486
RBMX	31	0.729789	0.584776
GAPDH	157	7.95286	4.0292
ATP5A1	53	0.904627	0.588156
HSPD1	87	1.07524	0.858572
HSPE1	63	0.179708	0.878853
HSPA9	80	0.34527	0.861952
CAPZB	29	-0.270872	0.65407
CAPZA1	27	0.0844874	0.713223
HBB	14	-0.732568	0.598296
HBA1	8	-0.872871	0.581395
ACTN1	23	-0.350712	0.616888
ACTN4	26	-0.327043	0.598296
XPO1	49	-0.194895	0.625338
ELAVL1	57	1.4754	0.748716
EEF1D	30	-1.28494	0.6659
EEF1G	71	0.242761	0.692942
RANBP1	16	-0.446149	0.581395
HSPA8	129	4.57539	1.16955
HNRNPR	59	1.66114	0.674351
NCL	46	0	0.360533
NPM1	36	-0.21926	0.613507
ETF1	45	0.863077	0.593226
CDC42	39	-0.165107	1.05969
ARHGDIA	21	-0.800041	0.584776
CANX	49	0	0.267577
HNRNPA0	38	1.02858	0.591536
CLTC	31	0.824436	0.606747
CLTA	11	0.363639	0.579705
CYCS	64	1.18968	0.733505
FH	40	0.593031	0.596606
MDH2	38	0.683728	0.616888
KRT5	15	1.41936	0.584776
PDIA6	46	2.49842	0.82984
KRT8	22	0.55453	0.692942
KRT18	21	0.28622	0.647309
ACTG1	75	2.42168	0.875473
CFL1	62	1.07626	0.691252
HSPA4	111	2.84745	0.895754
RPN1	38	0	0.265887
PPIH	22	0.117638	0.593226
RHOC	14	0.198645	0.579705
PRKCSH	17	-0.174255	0.645619
UBE2N	28	-1.68677	0.642239
UBA1	24	-2.41805	0.681111
ENO1	96	3.25261	0.698012
PCBP2	44	0.74903	0.66421
ALDOA	54	0.475424	0.770687
FKBP4	23	-0.464433	0.601677
UQCRC1	24	0.715467	0.579705
MDH1	41	1.03415	0.579705
COL6A1	12	-0.757481	0.591536
LDHA	49	0.218909	0.638859
LDHB	51	-0.167878	0.608437
TF	24	-0.00870306	0.625338
TFRC	35	-0.465665	0.775757
PRDX1	57	1.02234	0.591536
PCBP1	61	0.25805	0.723364
SOD1	66	0.315847	0.692942
PGAM1	38	-0.287858	0.606747
GOT2	34	-0.628066	0.794348
PKM	60	-0.622401	0.716604
HLA-A	7	0.00714535	0.579705
ITGB1	35	0.734627	0.723364
ITGA3	15	-0.211948	0.583085
PSME1	11	0.204137	0.579705
HSPH1	29	0.488756	0.579705
CFL2	15	-0.587112	0.584776
PDIA4	31	1.49286	0.65407
CALU	20	0.101452	0.586466
AZGP1	16	1.84024	0.789278
PIP	10	0	0.756017
VDAC2	30	-0.0671648	0.586466
VDAC1	41	0.387772	0.588156
YWHAE	42	-0.670906	0.65745
PRDX2	46	0.622192	0.618578
ANP32A	12	-0.291612	0.598296
SET	30	0.300247	0.599986
ACO2	42	0.927407	0.608437
SDHA	45	0.574387	0.65576
GDI2	38	-0.0252684	0.677731
RAB7A	26	-0.241966	0.618578
PA2G4	72	1.21881	0.645619
ITGA2	13	-0.0566719	0.579705
NME1	40	-0.957481	0.628718
PPIB	33	-0.130623	0.627028
RCN1	19	-0.106867	0.596606
RAB11B	8	-0.306424	0.579705
HSPA1B	26	0.841916	0.579705
HSPB1	53	-0.786867	0.833221
PFN1	31	0.136779	0.598296
ERO1L	11	0.667265	0.758856
AP2B1	11	-0.780303	0.598296
BSG	18	-0.610752	0.589846
PABPC1	49	0.330206	0.579705
TNPO1	37	-0.256976	0.586466
ST13	18	-0.718077	0.593226
FLNA	24	0.085031	0.598296
S100A7	31	-0.975616	1.16786
FABP5	29	0.164807	0.594916
PRDX5	30	0.435053	0.596606
APOA1	23	-0.223808	0.65069
SLC3A2	10	-0.550435	0.579705
CACYBP	22	0.0901016	0.579705
SKP1	28	-0.242393	0.605057
DDX39B	56	1.73504	0.613507
MANF	12	0	0.176312
GRN	24	0.572001	0.579705
LCP1	19	-0.0252822	0.588156
FSCN1	14	-0.208642	0.579705
CYB5R3	23	0.558323	0.687872
CYB5B	6	-1.24947	0.584776
FLNB	10	-0.447595	0.583085
KRT19	22	0.268729	0.6659
SERPINA1	33	-0.16102	0.706463
PPP1CA	29	-1.56024	0.66252
PPP2R1A	48	-0.459292	0.748716
TPT1	25	-0.58148	0.615197
PUF60	25	0.747743	0.583085
C3	34	0.636157	0.638859
SFPQ	30	-0.179177	0.642239
KRT6B	11	0	0.15772
IGLL5	3	-1.41852	0.608437
IGJ	3	-1.81459	0.591536
SSB	36	0.608586	0.583085
KRT9	10	1.19274	0.579705
CSTB	9	0	0.15772
CTSD	36	-0.237092	0.708153
EIF4H	45	0.000554109	0.608437
TTR	27	0.391054	0.588156
LCN2	14	2.49561	1.00392
LTF	21	-0.334825	0.926176
HNRNPDL	34	0.0690234	0.611817
RBBP7	14	-0.0330358	0.591536
DDB1	15	-1.95847	0.679421
CLU	27	-0.302194	0.642239
KRT7	11	1.42818	0.579705
ACAT1	13	-1.00734	0.589846
CAPN2	10	0.267482	0.594916
SERPINB3	24	0.0729444	0.753786
DYNC1LI1	17	-1.00313	0.593226
CSTA	12	-2.29197	0.65914
TGM1	8	-0.357128	0.586466
PGM5	15	0.506839	0.579705
FKBP2	17	-0.71469	0.605057
CAPN1	19	-0.841884	0.66252
NAP1L1	9	-2.22171	0.615197
LRPPRC	11	-0.44222	0.583085
KRT13	9	1.85635	0.579705
PEBP1	30	-1.73642	0.628718
ANXA1	35	-0.36136	0.696322
ANXA2	57	0.703736	0.687872
YWHAQ	32	-0.772598	0.591536
MYL6	20	-0.969836	0.618578
PGLS	12	0.191649	0.581395
HNRNPAB	41	0.093536	0.588156
DNAJC8	26	0.675173	0.579705
MYL12A	9	0.818478	0.579705
ARF1	25	-1.42942	0.637169
TBCA	7	-0.153827	0.579705
NACA	41	0.904153	0.581395
MTPN	5	-0.579702	0.584776
CBX3	10	-0.16238	0.599986
HSPA13	18	0.900309	0.579705
DSP	10	-0.0127075	0.581395
HPX	12	0.541978	0.579705
RALY	21	-0.168167	0.581395
KHSRP	28	-0.21895	0.605057
PRDX4	34	0.203295	0.606747
PRDX6	55	1.08985	0.677731
S100A11	15	-1.40883	0.65576
CASP14	8	-0.260818	0.599986
CTSC	25	-0.43953	0.794348
AHNAK	24	-2.03706	0.643929
DYNLRB1	4	-0.0361213	0.579705
NUDC	51	0.127199	0.594916
LMAN2	10	-0.269091	0.594916
SND1	17	-2.03391	0.642239
GM2A	19	1.11787	0.599986
CD59	17	-2.07457	0.677731
EIF6	23	-0.647215	0.581395
UBQLN1	31	-0.527105	0.66421
LGALS1	26	-1.21087	0.647309
FAM49B	9	-0.355896	0.579705
CSE1L	16	-1.78332	0.596606
PSAP	13	-1.03046	0.599986
PIGR	10	-1.25599	0.711533
ANXA6	14	-0.167883	0.593226
MLEC	6	0.289999	0.579705
PYGB	33	-0.312705	0.638859
DSTN	23	-2.2553	0.621958
TPD52	9	-1.0963	0.601677
PRDX3	44	0.641647	0.616888
CPNE3	4	-0.488734	0.583085
FKBP1A	16	-1.18298	0.594916
SCP2	7	1.7958	0.792658
CCDC58	5	-0.340197	0.589846
PDCD10	2	-1.31451	0.579705
C1QBP	22	-1.14042	0.630408
EIF1B	6	1.01053	0.579705
GC	9	1.11207	0.579705
ANXA11	13	-0.36435	0.584776
G3BP1	21	-0.286105	0.579705
STMN1	20	-2.12791	0.613507
PDLIM1	7	-1.16571	0.579705
ANPEP	8	-0.67415	0.586466
COTL1	11	-0.170469	0.581395
PLS3	26	-0.728647	0.621958
PPA1	30	-0.924675	0.618578
TGM3	3	-1.70868	0.581395
CALML5	10	-0.994364	0.687872
GSTO1	18	-1.09855	0.740265
TRIM28	12	-0.878964	0.606747
QARS	15	0.429163	0.579705
ANXA3	14	-0.558165	0.588156
ENOPH1	7	-1.40827	0.589846
ANXA5	38	-0.549107	0.623648
CNPY2	3	-0.737258	0.579705
BLMH	7	-2.03225	0.605057
TMX1	11	-1.44891	0.584776
CBX1	5	-0.127646	0.583085
GLO1	26	-0.943493	0.591536
FKBP10	12	-0.161964	0.584776
DBI	7	-0.915242	0.691252
GLRX3	17	-0.128752	0.583085
VIM	25	-1.31215	0.605057
CIRBP	9	0.498491	0.579705
TAGLN2	25	-0.824996	0.594916
TXNDC17	5	-0.186748	0.579705
HPCAL1	3	-0.779342	0.583085
FKBP3	14	-2.22677	0.613507
NENF	4	-0.775258	0.584776
CLIC1	20	-0.73567	0.603367
AHCY	42	-0.0431749	0.588156
PAEP	2	1.33172	0.579705
LCN1	9	3.10049	0.613507
TPD52L2	5	-0.571327	0.583085
PROCR	1	-1.33562	0.579705
ALDH1A3	3	-1.35253	0.586466
KLK3	13	-0.728014	0.922796
PSCA	2	-1.38833	0.583085
CRABP2	5	-1.73356	0.632098
S100A13	9	-0.266899	0.584776
TWF2	8	0.768222	0.579705
TXNDC12	10	-0.593477	0.581395
CNN3	7	-2.2672	0.598296
ANXA7	14	-1.18538	0.588156
IMPDH2	27	0.099454	0.586466
ANXA4	15	0.138619	0.584776
DCD	2	-1.38615	0.581395
CRNN	5	-1.18883	0.593226
NPTN	1	-1.24611	0.579705
CALM2	11	-0.753454	0.618578
DEFA1	3	1.46599	0.579705
FCGBP	3	-1.42806	0.591536
LETM1	2	-1.43032	0.579705
ZPR1	11	-1.35599	0.593226
PDCD6IP	13	-1.25081	0.583085
ACADVL	4	1.37822	0.579705
ASNA1	6	0.614241	0.579705
APEH	5	0.327877	0.579705
LRRC59	3	-1.76449	0.584776
SUB1	7	-1.2169	0.579705
PDCD5	6	0.441385	0.579705
MUC5B	1	-1.19364	0.579705
BPIFB1	2	0	0.15772
NOMO2	1	-1.27094	0.579705
APMAP	4	0.0950573	0.579705
ENSG00000251201	2	1.65744	0.579705
PGC	3	1.51362	0.579705
PCBD1	3	-0.397369	0.579705
A2ML1	1	-1.44478	0.579705
SERPINB13	1	-1.66794	0.579705
PLIN3	5	-1.53311	0.581395
CD97	2	-1.32371	0.579705
SH3BGRL3	1	-1.25603	0.579705
RTN3	1	-1.26441	0.579705
HDGF	1	-1.28262	0.579705
C19orf10	1	-1.46192	0.579705
YBX2	0	0	0
MSMB	0	0	0
RMDN1	0	0	0

## Sheet: networkanalysis_selected
Protein	Hub - Degree	Pertubation score	Disruption score
GAPDH	157	7.95286	4.0292
HSPA8	129	4.57539	1.16955				Top 5% of hubs
HSP90AA1	119	4.52252	0.841671				Top 5% of perturbation analysis
HSPA4	111	2.84745	0.895754				Top 5% of disruption analysis
ENO1	96	3.25261	0.698012
VCP	81	1.83481	1.10364
HSPA5	81	1.56201	1.06307
CCT2	97	2.1303	0.804489
EEF2	96	0.192343	0.924486
TPI1	93	0	1.28279
HSPD1	87	1.07524	0.858572
CCT8	82	1.90054	0.66083
HSP90AB1	82	1.23823	0.611817
HSPA9	80	0.34527	0.861952
CCT5	78	1.49235	0.623648
ACTG1	75	2.42168	0.87
PDIA6	46	2.49842	0.82984
S100A7	31	-0.975616	1.16786
LCN2	14	2.49561	1
LCN1	9	3.10049	0.613507

## Sheet: networkanalysis_venn
Selected protein	Prostate glandular cell expression	Prostate cancer(C0376358)	Metastasis of prostate cancer(C1282496)	Apoptosis	common between selected protein and prostate expression	common between selected protein and prostate cancer	common between selected protein and metastasis of prostate cancer	common between selected protein and apoptosis	common between selected protein , prostate expression, prostate cancer , metastasis and apoptosis
GAPDH	HSPA5	AR	FOLH1	ACAT1	HSPA5	GAPDH	HSP90AA1	GAPDH	HSPA5
HSPA8	ACTN1	PTEN	AR	ACO2	HSP90AB1	HSPA8	HSPA5	HSPA8
HSP90AA1	ACTN4	BRCA2	KLK3	ACTN4	HSPA8	HSP90AA1		HSP90AA1
HSPA4	HSP90AB1	CHEK2	PROS1	ALDH1A3	ENO1	HSPA4		HSPA4
ENO1	HSPA8	APC	PSAT1	ALDOA	HSPD1	ENO1		ENO1
VCP	ANXA2	MSMB	PLAG1	ANP32A	TPI1	VCP		VCP
HSPA5	ENO1	SPOP	EZH2	ANPEP	HSPA9	HSPA5		HSPA5
CCT2	P4HB	CDH1	NPEPPS	ANXA1	ACTG1	CCT2		CCT2
EEF2	HSPA1B	MXI1	IL6	ANXA11	CCT8	EEF2		EEF2
TPI1	AHNAK	HOXB13	EGFR	ANXA2	GAPDH	HSPD1		HSPD1
HSPD1	HSP90B1	CTNNB1	TP53	ANXA4	EEF2	HSP90AB1		CCT8
CCT8	HSPD1	FGFR4	PSCA	ANXA5	PDIA6	HSPA9		HSP90AB1
HSP90AB1	ANXA6	KRAS	ERG	ANXA6	HSPA4	ACTG1		HSPA9
HSPA9	ANXA1	CCND1	AKT1	ANXA7	CCT2	S100A7		CCT5
CCT5	VCL	TGFBR2	CAV1	AP2B1	CCT5	LCN2		LCN2
ACTG1	ATP5B	NKX3-1	PIK3CA	APMAP	VCP
PDIA6	PGK1	SRD5A1	IGF1	APOA1
S100A7	FLNB	PCAT1	PIK3CG	ARHGDIA
LCN2	TPI1	KLF6	PIK3CD	ATP5F1A
LCN1	HSPA9	EPHB2	PIK3CB	ATP5PD
	CALR	KLK3	ERBB2	BSG
	PLS3	NBN	PARP1	C1QBP
	ACTG1	PIK3CA	CXCL8	C3
	ANXA11	RNASEL	CXCR4	CALR
	HNRNPK	BRCA1	SRD5A2	CANX
	CCT3	HNF1B	MIR141	CAPN1
	PDIA4	TP53	BRCA1	CAPN2
	PDIA3	ZFHX3	HSPG2	CASP14
	PRDX1	SLC22A3	PTEN	CBX3
	PSAP	CTBP2	MTA1	CCT2
	CFL1	RFX6	CD44	CCT3
	PPA1	LDAH	TMPRSS2	CCT4
	PKM	FOXP4	MIR203A	CCT5
	CALU	LMTK2	HMGB1	CCT6A
	PFN1	PALB2	TNF	CCT8
	ATP5A1	EHBP1	COL11A2	CD59
	YWHAZ	FGF10	EDN1	CDC42
	PRDX6	POLK	AMACR	CFL1
	MDH2	NAT2	DPP4	CIRBP
	KRT19	CDKN1A	GNRH1	CLTC
	PEBP1	CDKN1B	MIR204	CLU
	PRKCSH	NDRG1	KRT13	CNPY2
	TFRC	VAV3	ESR2	COL1A1
	SERPINA1	AGR2	TGFB1	COL6A1
	PGAM1	CENPF	ALB	COX5A
	CCT8	IL24	MIR145	COX6B1
	NME1	CHD1	SLC28A3	CRABP2
	GAPDH	CLU	ACP3	CSE1L
	ANXA5	COMT	TRAF2	CSTA
	PABPC1	CREBBP	WNT5A	CSTB
	HNRNPA1	PARP1	DIO3	CTSD
	PRDX5	DAB2IP	PAQR7	CYCS
	HSPH1	CYP1A1	MTRR	DCD
	STIP1	CYP1B1	BMP6	DDB1
	CLIC1	CYP3A4	MYC	DEFA1
	EEF2	CYP17A1	HIF1A	DSP
	PDIA6	CYP19A1	AGR2	EEF1D
	UBA1	ACE	DLK1	EEF2
	ALDOA	NQO1	ADRB2	EIF6
	APEH	DNMT1	TNFRSF11B	ELAVL1
	LRPPRC	DNMT3B	PEBP1	ENO1
	TPD52L2	EGF	HSP90AA1	FH
	HNRNPA2B1	EGFR	TRAF4	FKBP1A
	EEF1D	EGR1	IL1B	FKBP4
	HSPB1	AHR	SPARC	FLNA
	TUBA1B	ERBB2	NOTCH1	FLNB
	GPI	ERCC2	BRCA2	GAPDH
	UBA52	AKT1	CD274	GLO1
	GM2A	ERG	MUC1	GPI
	LDHB	ESR1	CYP19A1	GRN
	HNRNPC	ESR2	SRD5A1	HBA1/HBA2
	NPM1	ETV1	CASP3	HBB
	NSFL1C	ETV4	MMP9	HDGF
	SOD1	EZH2	S100A4	HLA- A
	YWHAE	FGF2	CXCL16	HNRNPA1
	PSME1	FOXO1	CXCL12	HNRNPC
	AZGP1	SIRT1	SAI1	HNRNPK
	C1QBP	FOLH1	SDC1	HSP90AA1
	GOT2	BRD4	SFMBT2	HSP90AB1
	ANXA7	AMACR	ELAC2	HSP90B1
	DDX39B	GJA1	CCL2	HSPA1A/HSPA1B
	PCBP1	SETD2	RNASEL	HSPA4
	PDLIM1	NR3C1	RELB	HSPA5
	CANX	GRPR	BGLAP	HSPA8
	KHSRP	GSK3B	SATB1	HSPA9
	YWHAB	GSTM1	CHD8	HSPB1
	CTSD	GSTP1	PPP2R1A	HSPD1
	NCL	GSTT1	RMDN3	HSPE1
	CAPZA1	HIF1A	PSMD9	HSPH1
	FKBP3	HMOX1	PPP1CA	IMPDH2
	RPL12	FOXA1	ASPN	ITGA2
	KRT8	HPN	PARP14	ITGA3
	CLTC	APEX1	PMS2	ITGB1
	DLD	HSD3B1	PLAU	KLK3
	EEF1G	IGF1	PITX2	KPNB1
	ELAVL1	IGFBP3	PHB	KRT10
	PCBP2	IL6	PFKFB4	KRT18
	PRDX3	CXCL8	SERPINF1	KRT19
	ALDH1A3	IL10	CDK12	KRT8
	TXNRD1	GSTK1	DCTN4	LCN2
	ACO2	KLK2	SLC45A2	LDHA
	DBI	LEP	PPP2R2C	LETM1
	KRT7	MIR21	PTPA	LGALS1
	ERO1A	EPCAM	CAMK2N1	LTF
	CYB5R3	MDM2	MIR409	MANF
	RCN1	MET	PTGS2	MDH1
	TXNDC17	MLH1	PNPLA2	MTPN
	LDHA	MME	BACH1	MUC5B
	HSPA4	MMP9	RDH11	MYDGF
	PSMD2	MSR1	SLC12A9	NCL
	PYGB	MTHFR	PMEPA1	NME1
	HSPA13	MYC	PSAP	NPM1
	KLK3	ATM	PRSS3	P4HB
	HSPE1	NFE2L2	MAP2K5	PA2G4
	CSTA	NOS3	MAPK8	PABPC1
	CBX1	OGG1	PKN1	PAEP
	MYL6	SERPINE1	DCAF6	PCBP2
	HDGF	PAWR	SYBU	PDCD10
	FKBP4	PIK3CB	SAGE1	PDCD5
	ST13	PIK3CD	RMDN1	PDCD6IP
	PRDX2	PLAU	CD63	PDIA3
	CYCS	CCHCR1	AKR1C3	PEBP1
	HNRNPAB	RNF43	RUNX2	PFN1
	VDAC2	MAPK3	HAVCR2	PIGR
	PSMA7	PTGS2	PROK1	PIP
	GLO1	PTHLH	KAT8	PKM
	EIF4H	BCL2	ULK1	PPIB
	KRT5	ELAC2	SPARCL1	PPP1CA
	RPLP2	BGLAP	REG4	PPP2R1A
	CLTA	CXCL12	PIP5K1A	PRDX1
	YWHAQ	SHBG	FSD1L	PRDX2
	RBMX	SLC5A5	PARP9	PRDX3
	FH	SOD2	SMC1A	PRDX4
	PPIB	SOX2	DIAPH3	PRDX5
	PDCD6IP	SPINK1	CMIP	PRDX6
	GC	SRD5A2	GLRA3	PROCR
	TNPO1	ST14	TUSC3	PSAP
	SSB	STAT3	BECN1	PSCA
	UBE2N	AURKA	ADAM15	PSMA3
	ANXA3	TERT	KLK4	PSMA6
	S100A11	TGFB1	BCAR1	PSMA7
	PLIN3	TLR4	GDF15	PSMD11
	PA2G4	TMPRSS2	ATG5	PSMD2
	CNPY2	TPD52	LPXN	PUF60
	LRRC59	UGT2B15	CD163	QARS1
	FKBP1A	UGT2B17	KLF4	RAN
	PTBP1	VDR	GLYATL1	RANBP1
	SET	VEGFA	AURKB	RHOC
	RPS12	VIM	PYGO2	RPLP0
	CD59	VIP	PRC1	RPS12
	COX6B1	XRCC1	HSPB3	RPS18
	ITGA2	CALCA	CACNA1G	RPS3
	USP14	PSCA	SQSTM1	S100A11
	CBX3	CALR	IL18R1	S100A8
	MYDGF	NCOA3	ADAM9	S100A9
	HNRNPDL	MAD1L1	E2F8	SCP2
	SKP1	CASP9	PALB2	SDHA
	KRT18	CAV1	TFRC	SERPINA1
	GRN	AKR1C3	TERT	SERPINB3
	PTGES3	TNFSF10	HNF1B	SET
	ANPEP	MBD2	SYK	SF3A1
	SF3A1	CCND2	BSG	SFPQ
	AHCY	ZBED1	STAT6	SFTPD
	TUBB	GDF15	SSX2	SH3BGRL3
	GDI2	CAMKK2	SPINK1	SLC3A2
	ANP32A	CTSB	SMARCE1	SND1
	ATP5H	CYP3A5	SNAI2	SNRPA1
	FKBP10	ETV5	BMP7	SOD1
	CRABP2	TMEFF2	NME1-NME2	SSB
	TPD52	ANXA1	LINC00273	STIP1
	DYNLRB1	ICAM1	BMI1	STMN1
	DLAT	IL18	SHBG	SUB1
	LTF	JAK2	ARHGAP9	TAGLN2
	PSMA6	EAF2	TGM4	TF
	SCP2	AZGP1	TGFBR2	TFRC
	UQCRC1	NCOA1	SRD5A3	TGM1
	MANF	SCHLAP1	RNASEH2B	TGM3
	CCT2	NCOA2	MUL1	TLN1
	CCT5	JAZF1	FSD1	TMX1
	LETM1	HOXD3	TRPM8	TPD52
	UBQLN1	SERPINF1	NSD2	TPT1
	DNAJC8	PML	VEGFC	TRIM28
	CFL2	SELENOP	VEGFA	TTR
	ARF1	TGFA	UBE2I	TUBB
	SFPQ	NRP1	TWIST1	TXN
	ITGA3	IL27	PCAT18	TXNRD1
	KPNB1	SLC39A1	SSX2B	UBA1
	SUB1	HSD17B3	TTR	UBA52
	ACAT1	IDH1	TRIO	UBQLN1
	CCDC58	IGFBP7	TOP2A	USP14
	STMN1	IL2	THOP1	VCL
	RPS3	KMT2A	BLM	VCP
	CALM2	MPO	TMED7	VDAC2
	MDH1	TRPM4	BIN1	VIM
	ANXA4	DCAF6	ESR1	XPO1
	BSG	PRKDC	ERCC1	YBX2
	CCT6A	BAX	CRYBG1	YWHAB
	CNN3	CYP3A43	AHR	YWHAE
	EIF6	BMP7	EGF	YWHAQ
	RPN1	ADAM9	EEF1A1	YWHAZ
	SNRPA1	ERBB3	EDNRA	ZPR1
	RAB7A	NEAT1	ECE1	AIFM1
	TLN1	GPX3	DRD2	KAD2
	RALY	HSD3B2	DPEP1	AN32A
	APMAP	STMN1	CYP17A1	APAF
	RPS18	PON1	CBLL2	AVEN
	CYB5B	PPARA	CYP1B1	BAD
	CDC42	PAK6	DAB2IP	BAK
	MTPN	BRAF	DTX3L	BAX
	PDCD10	TOP2A	CTNND1	BBC3
	IMPDH2	HMGN5	ETV4	BCL2
	PUF60	UXT	F3	B2LA1
	ARHGDIA	NAT1	FGF2	B2CL1
	DSTN	TLR6	GNMT	B2L10
	TKT	ADRB2	STEAP1	B2L11
	CAPN1	ALOX5	GATA2	B2L12
	G3BP1	KLK5	GAS6	B2L13
	CPNE3	IRS1	SPDEF	B2L14
	QARS	ATF3	NUP62	B2CL2
	HNRNPA0	NGFR	FOSB	BECN1
	NENF	PIK3R1	SUZ12	BID
	NOMO2	TET2	COMMD3	BIK
	HNRNPR	SULT1E1	SIRT3	BIRC1
	RBBP7	SULT2A1	FN1	BIRC2
	ACADVL	TPT1	FMOD	BIRC3
	TPT1	DDR1	FLT3LG	BMF
	TBCA	CD276	KDM6B	BNIP3
	CAPN2	EIF3H	DKK1	BNI3L
	PSMA3	TNFRSF10A	FGFR2	BOK
	TXN	GREB1	CTNNB1	CASP1
	ZPR1	ABCC4	CTBP1	CASPA
	ASNA1	TXNRD2	DLC1	CASPC
	ETF1	SERPINA3	SEMA3A	CASPE
	PGLS	CTSD	CITED2	CASP2
	SND1	CYP2E1	CDKN2A	CASP3
	CACYBP	DEFB1	CDKN1A	CASP4
	PGM5	LPAR1	ABCC4	CASP5
	TMX1	EPHX1	FLOT1	CASP6
	NAP1L1	FHIT	CDK5	CASP7
	PRDX4	EHF	CDK2	CASP8
	COL1A2	GHR	EBI3	CASP9
	GLRX3	GNMT	TRAP1	CFLAR
	DDB1	AOX1	LRPPRC	CRADD
	XPO1	LPL	TMX2-CTNND1	XPO2
	COX5A	MIR106A	TMED7-TICAM2	CYC
	TRIM28	MMP13	MIR1246	CYLD
	HNRNPM	MRE11	HDAC6	DBLOH
	VCP	MSH3	NDRG1	NUCG
	DYNC1LI1	MT2A	HOXB13	FADD
	ENOPH1	NUCB2	CAP1	TNR6
	CAPZB	ZBTB7A	CSE1L	TNFL6
	NUDC	PIK3R2	CTCFL	G3P
	SDHA	ADI1	CRP	HRK
	VDAC1	PRKCZ	CLDN3	HTRA2
		RB1	CLDN4	PIDD
		RRAS	KLF6	MALT1
		CX3CL1	CCR5	MK08
		SMARCA1	H3P23	MCL1
		SPOCK1	PRDM4	MOAP1
		SSX2	GLIPR1	MYD88
		SULT1A1	DLL3	NALP1
		PRDX2	DCTN6	NALP3
		EZR	CTCF	NOL3
		XPO1	CXCR6	OPA1
		USP7	KHDRBS1	APR
		STEAP4	ZNRD2	ASC
		RUNX1	MIR543	RIPK1
		MED12	NEAT1	RIPK3
		HDAC6	SOST	SHLB1
		CDK2AP2	MIR338	TNFA
		BAZ2A	MIR151A	TR10A
		LZTS1	MMP14	TR10B
		CLDN3	MMP2	TR10C
		CLDN7	MMP1	TR10D
		DAG1	MIP	TNR1A
		GADD45A	ASAH1	TNR1B
		FOXC1	MET	TNF10
		ABO	MAP3K5	P53
		GSTA1	MCM7	TRADD
		GSTM3	EPCAM	TRAF1
		ANXA3	MIR96	TRAF2
		BIRC5	MIR34B	XAF1
		IGF2R	MIR34A	XIAP
		FASLG	MIR29A
		IL16	MIR23B
		LIFR	PALM2AKAP2
		MAP3K1	MSMB
		MIF	MSR1
		PDHA1	PCBP2
		CDK12	PRKN
		PLAUR	PCA3
		PODXL	PAEP
		B2M	PA2G4
		VPS52	OLR1
		SLC7A1	MIR375
		MAP3K7	YBX1
		VCP	NME2
		KMT2D	NME1
		H4C8	NKX3-1
		IL17RC	ATM
		ONECUT2	NCL
		MYBBP1A	MYO1E
		WASF3	MYO1C
		STARD3	RMDN2
		CSRP1	MIR21
		CREB3L4	MIR206
		EMP1	HSPB1
		ACSL4	HSPA5
		FBLN1	HSD3B1
		GCNT1	HPN
		GGT1	HGF
		PDIA3	ANXA2
		HMGB2	BICRA
		HPGD	RMC1
		HSD17B1	UBIAD1
		HSPA1A	SENP1
		IL1RN	GTF2H1
		ITPR1	MSH6
		JAK1	GSK3B
		ARG2	NR3C1
		LAMC1	FLVCR1
		LDHB	LYPD5
		LRP2	HSPB2
		MBD1	ICA1
		MUC4	ICAM1
		PCDH8	MIR135A1
		PDE4D	MIRLET7B
		PENK	LINC01194
		PMS1	LIF
		ATR	LCK
		IL17RD	KRAS
		PPP2R2A	TNPO1
		PARD3	CD82
		BAD	JAK1
		PVR	IRF1
		RAD23B	TNFRSF9
		RAG1	IL11
		RLN2	IL6R
		KLKP1	IL2
		BNIP3	TICAM2
		TERC	IFI27
		TIMP4	CAVIN1
		KDM6A
		ZIC2
		ZBTB16
		TBL1XR1
		TXNDC5
		CAPNS1
		PPFIBP2
		EIF3A
		ALDH1A2
		CCNH
		CYP7B1
		LITAF
		BCAR1
		NCOR1
		SETDB1
		CDH13
		SPON2
		PGRMC1
		ADAM28
		RALBP1
		CBX1
		AKAP13
		SLC31A1
		CRYAB
		CST6
		CYP2C19
		ALAD
		ETV3
		EWSR1
		SPEN
		SF3B1
		SSBP2
		GALNT3
		SENP6
		PHGDH
		ABR
		EFEMP2
		ANXA4
		HNRNPH1
		HRAS
		ID3
		IGFBP6
		ITGB3
		M6PR
		MTAP
		PAX6
		IRAK4
		DCXR
		LRP1B
		CASZ1
		PPL
		NOL8
		ATAD3A
		PPP3CA
		EIF2AK2
		PRSS8
		PTPRC
		PTPRK
		NECTIN2
		ARID4A
		ALOXE3
		ROBO1
		RPL10
		RPS19
		RXRA
		ABCG5
		BMPR1B
		SULT2B1
		TAP1
		TMF1
		TRAF1
		WNT10B
		EPS8L3
		ARHGEF5
		BAP1
		USO1
		MBTPS1
		CBR1
		MACIR
		CD9
		HERPUD1
		CDC27
		TOM1L1
		CDH12
		PDZK1IP1
		PATJ
		OLFM1
		FBLN5
		IVNS1ABP
		CELF2
		STARD10
		KDELR1
		SERINC3
		ERP29
		SPINK5
		CHD3
		ADAMTS8
		PKP3
		CHST14
		TIRAP
		ANTXR2
		TPP1
		PAQR4
		CNN3
		COL5A1
		COL15A1
		SPATA18
		NCOA7
		ASZ1
		TAF1L
		SESN3
		CST1
		PYHIN1
		IGSF5
		CYP2A6
		CYP2C18
		CYP11B2
		DNASE1L2
		EHHADH
		ARID2
		UNC13D
		EMP3
		ERF
		FGFR2
		DHX30
		ZNF292
		ERP44
		FAF2
		ARL6IP1
		JMJD6
		PDS5A
		RPRD2
		MGA
		JADE2
		AHCYL2
		SDF2L1
		ALOX12B
		CIZ1
		CLIC4
		ZBTB20
		LCE2B
		PLEK2
		TJP3
		TNFRSF21
		DHDH
		GNG5
		GOLGA4
		TTC9C
		RGMB
		GRB7
		KLF15
		THYN1
		PSMC3IP
		HBG1
		HBG2
		FOXA3
		HOXB9
		HSP90AB1
		IL6ST
		INS
		JUP
		SP5
		LAMB2
		MC2R
		ACHE
		MMP7
		MYCL
		NAGLU
		NFIC
		CNOT3
		NPPA
		NPR3
		P4HB
		NOX3
		COL5A3
		ITSN2
		CRYL1
		RLIM
		PIGP
		WAC
		PTRH2
		RASD1
		SLC26A4
		PDZK1
		PGAM2
		SERPINB10
		PITX3
		RAB4B
		PRRX1
		ATP7B
		WNT4
		HAO1
		DNAJC10
		PDP1
		SAMD9
		ACP3
		RNF31
		APPL2
		RFK
		TBC1D2
		STAB2
		NAGK
		CHD7
		PRKACB
		RNF130
		SELENOS
		ASH1L
		DNAJC3
		PRNP
		DIABLO
		TCEAL7
		SMARCAD1
		NIPAL3
		USP28
		KMT2C
		ENPP5
		RNASE4
		ROBO2
		RPL11
		RPL12
		RPN2
		ACSM3
		SIL1
		ITSN1
		NDST4
		SLC4A2
		SLC12A2
		SSR2
		ZFP36L2
		SURF4
		TBXAS1
		TBX3
		TCN2
		TCP1
		THBS1
		TLR5
		TMOD1
		TMSB4X
		TPBG
		TPD52L1
		HSP90B1
		TST
		TYMS
		U2AF1
		UCP3
		UCK2
		UMPS
		ZFAND5
		BRPF1
		MYH14
		GSTCD
		KAT6A
		AAAS
		CLPTM1L
		ARID1A
		PCDH11Y
		H2BC8
		GUCD1
		CHD6
		ACRBP
		CUL3
		NDST2
		BCAS1
		DEGS1
		CAV2
		TP63
		B4GALT4
		MATN4
		CREG1
		CPNE3
		ZNF160
		CLDN9
		ZMYM3
		INTS4
		FBXO44
		GRHPR
		GSTO1
		EI24
		KEAP1
		REC8
		PDGFRB
		STX4
		KLK15
		RAD51
		MDM4
		PRNCR1
		SRA1
		STAT6
		GLB1
		SPINT2
		RGS17
		POU5F1B
		PDLIM5
		PLCL1
		BRIP1
		PCAT19
		RAD50
		F13A1
		ZNF652
		MUTYH
		NAB2
		RAD51B
		MLPH
		CCAT2
		TNRC6B
		GREM1
		ABCC6
		LSAMP
		CTNNBL1
		THADA
		BMPR1A
		ZGPAT
		CD24
		TMED7-TICAM2
		ANKRD44-IT1
		LINC01496
		CDKN2A
		CASC19
		CRISP3
		YAP1
		CIB1
		ZNRD2
		AHSA1
		KHDRBS1
		CXCR6
		DCTN6
		MTCO2P12
		FERMT2
		GLIPR1
		CHGA
		RASSF1
		FAM83F
		H3P23
		H3P10
		COL11A2
		SLCO6A1
		CRK
		CRP
		MAPK14
		CSF2
		ADRA1A
		CTAG1B
		ADRA2B
		CBLL2
		CYP24A1
		CYP27B1
		CFAP161
		DHCR24
		AFM
		DPT
		E2F1
		EDN1
		EDNRA
		EIF4E
		ELAVL2
		EN2
		AKT2
		ETS1
		PTK2B
		FASN
		GPRC6A
		FGF8
		FGFR1
		FOXM1
		FOXO3
		FN1
		TRAM1
		FOS
		FOSB
		ALOX15
		CTAG1A
		MTOR
		ZBTB38
		GABPA
		SPDEF
		ARIH1
		PART1
		RNF19A
		POLDIP2
		GATA2
		GATA3
		STEAP1
		GHRH
		DKK3
		HPGDS
		GLI1
		GNRH1
		GPR42
		GPX1
		FLVCR1
		PYCARD
		CD274
		GRM7
		GRP
		GSTM2
		MSH6
		GRHL1
		SENP1
		RMC1
		PSAT1
		ANXA2
		HARS1
		HDAC1
		HGF
		HMGB1
		HSPA4
		HSPA5
		XIAP
		HSPB1
		HSPB2
		HSP90AA1
		IFI27
		IFNG
		PWAR4
		IGF1R
		IGF2
		APRT
		TICAM2
		IK
		IL1B
		IL4
		SHROOM2
		JUN
		JUNB
		CD82
		KCNN3
		MALAT1
		KDR
		LGALS3
		LMNA
		MIR141
		MIR143
		MIR145
		MIR146A
		MIR17
		MIR182
		MIR183
		MIR195
		MIR200C
		MIR203A
		MIR204
		MIR205
		MIR221
		MIR224
		MIR30D
		MIR34A
		SMAD4
		STS
		MAOA
		MCAM
		MCL1
		MFAP1
		MGMT
		MMP2
		MMP3
		MMP14
		MRC1
		MSH2
		MST1
		COX2
		MUC1
		MYCN
		NFKB1
		NOTCH1
		YBX1
		NTS
		MIR375
		TNFRSF11B
		PEBP1
		PCSK6
		PCA3
		PRKN
		FOXP3
		TMED7
		PCNA
		ABCB1
		PIM1
		PIK3CG
		PITX2
		PLAG1
		PLK1
		POU5F1
		PPARG
		SIDT1
		PTPA
		VPS53
		TRPV6
		PRKAA1
		PAG1
		PRKD1
		MAPK1
		MAPK8
		PCDHGA2
		PCDHGA1
		PCDHA7
		PCDHA6
		PCDHA5
		PCDHA4
		PCDHA3
		PCDHA2
		PCDHA1
		PRL
		PROS1
		SLC12A9
		ACKR3
		PCBP4
		PSMD9
		PTK2
		CRACD
		BARD1
		PVT1
		PXN
		RAC1
		RAD51C
		RAD51D
		RAF1
		RARB
		OPN1LW
		RELA
		ACTB
		EEFSEC
		S100A9
		CCL2
		PCGEM1
		POU5F1P3
		CSMD1
		POU5F1P4
		EBF2
		GORASP1
		BMI1
		SKP2
		WNK1
		SLC2A1
		SLC6A8
		SNAI2
		BOLL
		SOX4
		SOX9
		SPARC
		SPP1
		SRC
		SREBF1
		SRF
		SST
		SSTR4
		STAT5A
		STAT5B
		BRS3
		BSG
		SYT1
		KLF5
		ZEB1
		TFF3
		TIMP1
		TNF
		CASC8
		TWIST1
		CCR2
		VEGFC
		WNT5A
		PCAP
		CXCR4
		CYREN
		GGCT
		TRPM8
		FSD1
		MUL1
		AIMP2
		CALCR
		NCOA4
		OR51E2
		TRIM8
		CASP3
		FSD1L
		ARMC2
		CASP8
		CASR
		CAT
		CBX4
		SLC45A3
		RUNX2
		TNFSF11
		VAMP8
		TNFRSF25
		PROM1
		NR1I2
		HSPB3
		F2RL3
		SOCS3
		MTA1
		ANKRD44
		LPAR2
		DNER
		KLF4
		LONP1
		ADIPOQ
		GRAP2
		MAGED1
		NPEPPS
		HPCX
		CD44
		CELSR1
		KLK4
		HDAC9
		FARP2
		CDK5
		CKAP4
		PSIP1
		AZIN2
		ETS2
		F3
		KDM1A
		TBC1D9
		SMUG1
		ANXA7
		GADL1
		IFNB1
		JUND
		LCN2
		MIR193A
		MIR31
		MIR96
		ASAH1
		MMP1
		ODC1
		PAEP
		GDE1
		MED15
		PGR
		PKM
		PLA2G1B
		PTOV1
		PRKAA2
		PRKAB1
		ROS1
		RPE65
		S100A8
		CCL5
		MAP2K4
		TGM4
		TIMP2
		UVRAG
		YWHAZ
		COL18A1
		DYNLL1
		TNFRSF10B
		INPP4B
		CFLAR
		SQSTM1
		AURKB
		MTDH
		KDM4A
		CDK2
		KAT5
		PLB1
		DPYSL3
		AGT
		E2F3
		EIF4EBP1
		ELK1
		FKBP4
		DKK1
		ALOX12
		GNRHR
		HOXC6
		IGFBP1
		CCN1
		IL1A
		ILK
		INSR
		LINC01194
		MIR15A
		TACSTD2
		MIR29A
		MIR301A
		MIR30C2
		MYO6
		NGF
		NTSR1
		GOLM1
		PHB
		PIN1
		PLG
		PMS2
		MAP2K7
		RARRES1
		ROCK1
		BCR
		SATB1
		SDC1
		SGK1
		BMP2
		BMP6
		SP1
		TGFB1I1
		TIMP3
		CCK
		PTTG1
		CDC6
		CBR3-AS1
		CDH11
		CDX2
		POSTN
		CTCF
		PPARGC1A
		KLK11
		SLCO2B1
		ADM
		CTBP1
		CTLA4
		CTNND2
		OXER1
		DLX1
		JAG1
		ENO2
		F2R
		NUP62
		STEAP2
		SLCO1B3
		CXCL1
		GTF2H1
		TBX21
		HTC2
		IGFBP2
		FAS
		IL15
		LGALS1
		MIRLET7C
		MIR100
		MIR185
		MIR186
		MIR200B
		MIR210
		MIR212
		MIR23B
		MIR27A
		MIR30C1
		MIR34B
		HPC3
		KLK14
		MIR133B
		CCN3
		PDCD1
		WWOX
		TLR9
		MIR449A
		AXL
		PMEPA1
		CHPT1
		MIB1
		CIP2A
		RAD9A
		REN
		BDNF
		S100A4
		SFRP1
		STAT1
		TGFB2
		TLR3
		XPC
		NANOG
		PDGFD
		RUNX3
		TNFRSF11A
		GPRC5A
		CD151
		CDK1
		HOTAIR
		UBE2C
		PRRT2
		CHUK
		CCR5
		CCR7
		CREB1
		CSTA
		CYP2B6
		AKR1C2
		TIMM8A
		ATN1
		DUSP1
		AGTR1
		EDNRB
		ELK4
		EPHA3
		ERCC5
		ESRRB
		ALDH1A1
		FABP5
		FGF7
		FGFR3
		PEG10
		FLT4
		SEC14L2
		LPAR3
		GAPDH
		GAS6
		GC
		GH1
		SGSM3
		ANG
		LYPD5
		GTF2H2
		HMGA1
		ID1
		ID4
		CXCR2
		INHA
		KRT18
		MIR152
		MIR222
		SMAD2
		SMAD3
		VN1R17P
		MIR331
		MTR
		MYH6
		NOS2
		PNP
		PRDX1
		PAK1
		ADIPOR1
		DCTN4
		LEF1
		HSD17B7
		UGT1A1
		MED1
		PPP5C
		IMPACT
		NLRP2
		PRKCA
		PRKCB
		PKN1
		MAPK7
		TDRD1
		KLK10
		PSAP
		PSMA1
		MIR193B
		CXCL16
		GAS5
		CXCL5
		SIAH2
		SLPI
		SMARCA4
		SNAI1
		SOAT1
		STK11
		TAC1
		TCF7L2
		TGFBR1
		TP73
		NR2C2
		TRAF6
		POTEF
		TXN
		FZD4
		TMPRSS13
		SPHK1
		LMLN
		XPR1
		CD163
		PAGE4
		AKAP12
		NCOR2
		ZEB2
		LINC01672
		COMMD3-BMI1
		CDK4
		CDK9
		SPRY2
		CDKN3
		DLC1
		FST
		CEACAM5
		SEMA3C
		IFI44
		TXNIP
		HPSE
		SUB1
		CHKA
		CHRM3
		H3P33
		ADCYAP1
		MRGPRX3
		MRGPRX4
		PRAP1
		GPR151
		OR51E1
		VCAN
		PDIK1L
		CYP2D6
		DAB2
		DCN
		DDIT3
		DDX5
		E2F5
		ABCA1
		EEF1A1
		PRSS55
		ALB
		FOLH1B
		ALKBH3
		ZHX2
		FKBP5
		FLI1
		FLNA
		FLT1
		ALOX15B
		ALPP
		MRGPRX1
		SH2B1
		PDCD4
		GPC1
		UTS2R
		ANGPT1
		ANGPT2
		GPER1
		GRN
		CERS2
		H2AZ1
		ANXA5
		HLA-DRB1
		HMMR
		HNF4A
		HNRNPK
		APOE
		ITGAV
		KCNH2
		KLK1
		LDLR
		LEPR
		LOX
		MIR126
		MIR130B
		MIR139
		MIR150
		MIR154
		MIR155
		MIR20A
		MIR214
		MIR223
		MIR26B
		MIR29B1
		MIR29B2
		MIR93
		CD46
		MDK
		MKI67
		ABCC1
		GPR166P
		NME1
		NPY
		NOTCH3
		NPAS2
		NTRK1
		MIR378A
		ANO7
		PAX2
		PECAM1
		PGK1
		PLA2G2A
		IL17D
		TRPM7
		TUG1
		PPT1
		KDM3A
		PRLR
		NDRG2
		PTK6
		RASA1
		RASGRF1
		LGR6
		REST
		BLM
		SET
		SOD1
		SOS1
		SRY
		SSTR2
		BTF3P11
		TFF1
		THY1
		NR1H2
		XRCC3
		BTG2
		WDR77
		NOX5
		TFPI2
		DHDDS
		CALM1
		CALM2
		CALM3
		HMGA2
		MLRL
		USP9X
		CAPZB
		CASP1
		ARHGAP24
		RECK
		PROK1
		HAVCR2
		SOCS1
		BECN1
		TRIM24
		SOCS2
		CCNB1
		SLC16A4
		SLC16A3
		ABCG2
		CDC25C
		CDKN2B-AS1
		TSPY10
		HOTTIP
		TNK2
		PCAT14
		PAK4
		PRMT5
		OLFM4
		CXCL13
		CFL1
		CFTR
		LYVE1
		TMED10
		PIM2
		WWP1
		LOC110806263
		FSTL1
		CISH
		ANIB1
		CNR1
		CPT1A
		CSF1R
		PWAR1
		CTSK
		CTSZ
		CYP1A2
		CYP11A1
		PRUNE2
		CYP27A1
		DSPP
		ECE1
		A2M
		CRYBG1
		ENG
		EPO
		ERCC1
		ESRRA
		FABP4
		ACSL3
		FAP
		FER
		FGF13
		FHL2
		ELL2
		KDM4B
		SRRM2
		XRCC6
		TNFAIP8
		NOC2L
		GBX2
		AMELX
		GDF2
		FOXP1
		AGO2
		RBMS3
		GLO1
		GLS
		CXCR3
		CTBP1-AS
		GIT1
		NOB1
		GSN
		HADHB
		HDAC2
		ANXA6
		HIC1
		HK2
		ACACA
		HLA-A
		HOXC8
		HP
		HPRT1
		HSPD1
		HSPG2
		HYAL1
		IL7
		AQP3
		IL17A
		ITGB1
		KIT
		KIF22
		KPNA2
		LDHA
		LGALS8
		LRP1
		MIRLET7B
		MIR132
		MIR148A
		MIR16-1
		MIR191
		MIR199A1
		MIR199A2
		MIR19A
		MIR200A
		MIR206
		MIR22
		MIR23A
		MIR27B
		MIR32
		MIR320A
		MIR99A
		ARRB2
		MCM7
		MECP2
		MMP16
		KLK12
		MST1R
		COX1
		NFATC1
		NPM1
		MIR424
		OSM
		P2RX7
		PA2G4
		SLC45A2
		NUSAP1
		MZB1
		TNFRSF12A
		SCARA3
		MPC1
		PKD1
		PLAT
		POLB
		ING3
		PPARD
		XAF1
		LGR4
		PBK
		MAP2K5
		LGMN
		PNO1
		PTBP1
		MIR499A
		PTPN1
		WFDC1
		RAC3
		RAP1A
		RBM3
		SNORD15A
		MBOAT4
		RPS6KB1
		CEACAM1
		SELE
		SFRP4
		SIM2
		UCA1
		SOD3
		SPG7
		SREBF2
		SSTR1
		ADAM17
		TEP1
		TFPI
		TGM2
		TSPO
		TLR1
		TP53BP1
		CRISP2
		TSG101
		TSPY1
		TSPY3
		UBE3A
		TRPV1
		WNT11
		ZFP36
		SLC52A2
		LIN28A
		FOSL1
		SETD7
		KDM5D
		SESN2
		CASP7
		MIEN1
		NR0B2
		PRAC1
		SRRM4
		SNORD35B
		MAK16
		SPZ1
		SLC43A1
		SNORD14B
		SNORD14C
		SNORD14D
		SNORD14E
		PIAS1
		PDLIM4
		IRS2
		CDK5R1
		ARHGEF7
		CCNA1
		RGN
		ARHGEF2
		NOG
		CLOCK
		CD40LG
		MTSS1
		AKT3
		MIR888
		MIR708
		MIR1301
		PARP2
		MIR2909
		MIR466
		HUWE1
		LINC-ROR
		PGR-AS1
		TRAP1
		RBM5
		ADAM10
		TRIM13
		CDK7
		TRIB1
		CDK8
		SPRY1
		CDKN2B
		LANCL1
		AKR1A1
		TUBB3
		CAP1
		CARM1
		CEBPB
		GNA13
		POLD3
		PTGES3
		PLAC1
		LILRB1
		SMR3B
		GADD45G
		PRDX3
		WDR5
		RPP14
		ZWINT
		CDC37
		PTP4A3
		CHI3L1
		LINC02605
		CBX3
		H3P8
		H3P17
		ARL11
		AGAP2
		DCD
		H4-16
		CCR4
		CCR6
		COMP
		MAP3K8
		COX8A
		CLDN4
		CPOX
		CPT2
		CRAT
		ATF2
		ZBTB46
		NKX2-5
		CXADR
		SLC2A12
		DAPK3
		DDC
		TMPRSS6
		AGER
		DPEP1
		DPP4
		HBEGF
		EPHA2
		CADM4
		EPAS1
		EPHB4
		ETV6
		ALCAM
		F2RL1
		SPATA19
		ALDH1A3
		EFEMP1
		FDPS
		MMRN1
		TPX2
		FOXC2
		PHLPP2
		KDM4C
		PHF8
		PHLPP1
		PPP1R13B
		CBX5
		ALPI
		FTH1
		ABL1
		FUS
		FUT4
		RICTOR
		FYN
		GNL3
		NUPR1
		LATS2
		GDNF
		GFI1
		GHRHR
		GHSR
		NOX1
		PELP1
		BIN1
		GNAS
		CAVIN1
		TMED10P1
		TRIM59
		LAMTOR2
		MYLIP
		RACGAP1
		UHRF1
		OBP2A
		H1-0
		H2AX
		HDGF
		HIP1
		HMGCR
		NR4A1
		FOXA2
		HOXA10
		HOXA13
		HES1
		HSD17B2
		HSD17B4
		HSF1
		TNC
		IAPP
		ICA1
		IFNA1
		IFNA13
		IL2RA
		IL2RB
		IL13
		IDO1
		ITGA6
		ISG20
		ITGA5
		ITK
		KCNMA1
		KISS1
		KRT8
		KMT5A
		KRT19
		RND3
		LAMB3
		LAMP2
		RPSA
		LASP1
		LGALS3BP
		LIG4
		LIMK1
		LMO2
		FENDRR
		LPA
		LRP5
		ARNT
		MIR107
		MIR125A
		MIR130A
		MIR137
		MIR192
		MIR198
		ARR3
		MIR30A
		MIR33A
		MIR17HG
		SMAD1
		MAGEA3
		MAZ
		MEIS1
		MEIS2
		MIAT
		MIR330
		MIR335
		MT1A
		ATP6
		PPP1R12A
		NCAM1
		DRG1
		NEDD4
		NF2
		NHS
		NTRK2
		MIR361
		MIR381
		MIR425
		OLR1
		ALDH7A1
		PBX1
		PCBP1
		NDUFA13
		ABHD5
		ING4
		LINC00328
		ERGIC2
		PDGFRA
		SF3B6
		ENPP1
		PER1
		PFKFB4
		PGF
		SERPINB5
		PIP
		PITX1
		PKD3
		PLA2G4A
		SERPINF2
		PLXNB1
		PMAIP1
		XRN1
		UGT2B28
		DDX56
		PPP1R12C
		ANO1
		TRIM68
		PPP2CA
		FBXW7
		MEG3
		H4C15
		CAMK2N1
		HES6
		TRIM36
		PRG2
		PRKAR1A
		PRKCI
		MYDGF
		MAPK9
		MAP2K1
		KLK6
		EMSY
		PLAAT1
		PSMD7
		DANCR
		PTH
		PTGS1
		MIR452
		MIR409
		MIR146B
		MIR500A
		GATAD2B
		KIDINS220
		QSOX1
		PTPN7
		SUGP1
		HAMP
		CCDC181
		ZNF410
		PTPRF
		PYCR1
		RAN
		RARA
		BCL2L1
		RING1
		BRD2
		RPL19
		MIR483
		MIR455
		RRAD
		RREB1
		RRM2
		SORT1
		S100A6
		SCD
		TP53AIP1
		GOLPH3
		SFRP5
		CXCR5
		TTTY15
		SHH
		SHOX2
		SMYD3
		BMP4
		CXADRP1
		FSCN1
		SQLE
		SRM
		SRPK1
		SSTR5
		ST13
		STC1
		STIM1
		SYP
		HNF1A
		TCF3
		MIR574
		MIR615
		BTK
		TEAD1
		TEK
		TERF2
		TFAP2A
		TFRC
		TGFB3
		THBS2
		TOP2B
		TRAF2
		TRPM2
		TRPS1
		SSX2B
		TXNRD1
		TYR
		VPS51
		VCL
		VIPR1
		VTN
		NSD2
		WNT1
		XRCC4
		CA9
		ZNF217
		PRDM2
		FZD5
		FTO
		CAMKMT
		CMIP
		SLC7A5
		DIAPH3
		TLR10
		CAPG
		CAPN2
		H4C9
		AXIN2
		FZD8
		NUF2
		H4C1
		SOX7
		H4C4
		H4C6
		H4C12
		H4C11
		H4C3
		H4C2
		H4C5
		H4C13
		H4C14
		ITCH
		PLA2G6
		CCDC8
		PLA2G10
		SPARCL1
		MAGT1
		KAT8
		TCHP
		LZTS2
		CUL4B
		CUL4A
		ORAI1
		ZIC5
		BHLHE40
		HSD17B6
		PDE5A
		EIF3B
		RIPK1
		ADAM15
		KRIT1
		WASF1
		SPAG9
		SLC7A7
		SLC7A6
		USP2
		CBFA2T2
		EXO1
		SLC33A1
		PPIG
		COX5A
		ATG5
		CD38
		PTGES
		CD40
		CD47
		CD59
		CD63
		HDAC4
		PCLAF
		MELK
		MAGI2
		TLK1
		G3BP2
		CDC20
		NR1I3
		CDC42
		CDH2
		CDH3
		VTRNA2-1
		MIR875
		MIR744
		MIR374B
		MIR301B
		MIR543
		LOXL1-AS1
		MIR1266
		MIR1271
		MIR3622A
		PCAT6
		CCAT1
		MICA
		DNM1L
		MIR4534
		NR1H3
		SPRY4-IT1
		TSPAN1
		KIF20A
		TRIM28
		DHRS9
		TRPM2-AS
		RNF41
		CDK6
		CTDSPL
		RABEPK
		RAMP1
		STUB1
		TP53COR1
		MAEA
		APC2
		APBB3
		PCAT2
		CNPY2
		KLF2
		SEMA3A
		TUBA1B
		PIAS3
		PCAT29
		ECI2
		MERTK
		CLEC10A
		CEBPA
		CEBPD
		ATG7
		PCSEAT
		PRDX4
		HTATIP2
		PAICS
		HEXIM1
		NPRL2
		CETN1
		NES
		KDM5B
		IQGAP2
		SEPTIN9
		CCR9
		CGA
		NEU3
		PPP1R13L
		CCL27
		BTG3
		SNORD138
		STIP1
		EBNA1BP2
		IMMT
[truncated: 2,503 more rows]
